# Supplementary material
Source: ML conference proceedings conference paper supplement (https://proceedings.neurips.cc/paper_files/paper/2014/hash/c59b469d724f7919b7d35514184fdc0f-Abstract.html)
Supplement: Supplementary file 1 [file c59b469d724f7919b7d35514184fdc0f-Supplemental.zip]

Archive with 1 entries (1 files):
- cf_latent_source_supplementary.pdf
